# Supplementary material
Source: PubMed Central journal article supplement (PMC5708532)
Supplement: NIHMS73391-supplement-Supplementary_Table.pdf [file NIHMS73391-supplement-Supplementary_Table.pdf]

**Supplementary Table.** Clinical and instrumental features of the three patients.

| <b>Patient n.</b>                         | <b>1</b>                                                                       | <b>2</b>                                                                        | <b>3</b>                       |
|-------------------------------------------|--------------------------------------------------------------------------------|---------------------------------------------------------------------------------|--------------------------------|
| <b>Sex</b>                                | Male                                                                           | Male                                                                            | Female                         |
| <b>Ethnic origin</b>                      | Italian                                                                        | Italian                                                                         | Turkish                        |
| <b>Parental consanguinity</b>             | No                                                                             | No                                                                              | Yes (second grade cousins)     |
| <b>Unaffected sibs</b>                    | No                                                                             | No                                                                              | No                             |
| <b>Affected sibs</b>                      | Yes (patient 2 and spontaneous abortion)                                       | Yes (patient 1 and spontaneous abortion)                                        | No                             |
| <b>Family history</b>                     | Positive for Gaucher disease in paternal line                                  | Positive for Gaucher disease in paternal line                                   | Negative                       |
| <b>Age at evaluation</b>                  | 14 years                                                                       | 8 years                                                                         | 11 years                       |
| <b>Psychomotor development</b>            | Delayed: walk unaided at 6 years of age; no acquisition of expressive language | Delayed: walk unaided at 3 years of age, no acquisition of expressive language  | Delayed                        |
| <b>Intelligence Quotient (WISC III-R)</b> | Moderate intellectual disability (PIQ= 46).<br>Only performance skills         | Moderate intellectual disability (PIQ= 41).<br>Only performance skills could be | Severe intellectual disability |

|                                            |                                                                                                                |                                                                               |                                                                       |
|--------------------------------------------|----------------------------------------------------------------------------------------------------------------|-------------------------------------------------------------------------------|-----------------------------------------------------------------------|
|                                            | could be evaluated                                                                                             | evaluated                                                                     |                                                                       |
| <b>Behavior, social skills</b>             | Good social skills                                                                                             | Good social skills                                                            | Poor social skills                                                    |
| <b>Learning</b>                            | Able to read and write words<br>in capital letters printed                                                     | None acquisition                                                              | None acquisition                                                      |
| <b>Language</b>                            | Absent expressive language.<br>Learning sign language.<br>Oro-motor dyspraxia                                  | Absent expressive language.<br>Learning sign language. Oro-motor<br>dyspraxia | Poor expressive language and<br>social skills                         |
| <b>Neurological findings</b>               | Diffuse hypotonia, hand<br>dysmetria, and gait ataxia                                                          | Diffuse hypotonia, hand dysmetria,<br>and gait ataxia                         | Diffuse hypotonia and clumsiness.                                     |
| <b>Neuro-ophthalmological<br/>findings</b> | Reduced visual acuity,<br>nystagmus, oculomotor<br>apraxia.<br>Fundus oculi: bilateral optic<br>nerve coloboma | Oculomotor apraxia, nystagmus<br>Fundus oculi: coloboma in left eye           | Severe visual impairment and<br>roving nystagmus (Leber<br>amaurosis) |
| <b>Electroretinogram</b>                   | amplitude reduction (early<br>stage)                                                                           | Normal                                                                        | Response was absent                                                   |
| <b>Brainstem auditory evoked</b>           | Normal                                                                                                         | Normal                                                                        | Normal                                                                |

|                                                  |                                                                                                                              |                                                                                                               |                     |
|--------------------------------------------------|------------------------------------------------------------------------------------------------------------------------------|---------------------------------------------------------------------------------------------------------------|---------------------|
| <b>potentials</b>                                |                                                                                                                              |                                                                                                               |                     |
| <b>EEG</b>                                       | Normal                                                                                                                       | Normal                                                                                                        | /                   |
| <b>Dimorphisms and extra-brain malformations</b> | No                                                                                                                           | No                                                                                                            | Facial dysmorphisms |
| <b>Liver</b>                                     | Mild hepato-splenomegaly;<br>congenital hepatic fibrosis;<br>mild portal hypertension                                        | Hepatosplenomegaly; congenital<br>hepatic fibrosis and portal<br>hypertension, treated with specific<br>drugs | Normal              |
| <b>Kidney</b>                                    | Congenital unilateral<br>polycystic kidney (right)<br>with progressive atrophy and<br>hypertrophy of contralateral<br>kidney | Normal                                                                                                        | Normal              |

Abbreviations: PIQ= performance Intellectual Quotient; WISC-III= ; Wechsler Intelligence Scale III-Revised.
